# Supplementary material for: On the Effects of Scale for Ecosystem Services Mapping
Source: PLOS journal article supplement (doi:10.1371/journal.pone.0112601), 2014-12-30
Supplement: S3 (10.1371/journal.pone.0112601.s003) [file journal.pone.0112601.s003]

| Ecosystem service    | Case study | Input layer                                      | Coarse-resolution data source                                    | Fine-resolution data source                                            |
|----------------------|------------|--------------------------------------------------|------------------------------------------------------------------|------------------------------------------------------------------------|
| Carbon sequestration | Puyallup   | Forest successional stage                        | No data (Bayesian priors)                                        | Interagency Vegetation Mapping Program (30 m)                          |
|                      |            | Tree canopy cover                                | UMD-GLCF (1 km <sup>2</sup> )                                    | National Land Cover Dataset (30 m)                                     |
|                      |            | Hardwood: softwood ratio                         | GlobCover 2005-06 (300 m)                                        | Interagency Vegetation Mapping Program (30 m)                          |
|                      |            | Summer high: winter low temperature differential | WorldClim (1 km <sup>2</sup> )                                   | PRISM (800 m)                                                          |
|                      | Stubai     | Forest parcels                                   | CORINE Land Cover (250 m)                                        | Local datasets Tyrolean Information System (tiris, Land Tirol©) (25 m) |
|                      |            | Yearly forest growth rate                        | Changes of the timber stock [65,66]                              | Changes of the timber stock [65,66]                                    |
|                      | Davos      | Land use type                                    | CORINE Land Cover (250 m)                                        | Local land use-land cover dataset (25 m)                               |
|                      |            | Growth of belowground biomass                    | “root to shoot” ratio of belowground to aboveground biomass [68] | “root to shoot” ratio of belowground to aboveground biomass [68]       |
|                      |            | Yearly forest growth rate                        | 4.87 m <sup>3</sup> /ha/y [60]                                   | 4.87 m <sup>3</sup> /ha/y [60]                                         |
|                      |            | Carbon mitigation capacity                       | Following [67]: 5.52 t CO <sub>2</sub> /ha/y in Davos            | Following [67]: 5.52 t CO <sub>2</sub> /ha/y in Davos                  |
|                      | Trentino   | Forest parcels                                   | CORINE Land Cover (250 m)                                        | Local forest inventory (25 m)                                          |
|                      |            | Land use type                                    | CORINE Land Cover (250 m)                                        | Local land use-land cover dataset (25 m)                               |

|                  |          | Value of carbon sequestration   | Following a local inventory [69]              | Following a local inventory [69]                                                                     |
|------------------|----------|---------------------------------|-----------------------------------------------|------------------------------------------------------------------------------------------------------|
| Flood regulation | Puyallup | Precipitation                   | WorldClim (1 km <sup>2</sup> )                | PRISM (800 m)                                                                                        |
|                  |          | Slope                           | SRTM (90)                                     | National Elevation Dataset (30 m)                                                                    |
|                  |          | Hydrologic Soils Group          | University of Vermont (1 km <sup>2</sup> )    | SSURGO (30 m)                                                                                        |
|                  |          | Impervious surface cover        | NASA (1 km <sup>2</sup> )                     | National Land Cover Dataset (30 m)                                                                   |
|                  |          | Tree canopy cover               | UMD-GLCF (1 km <sup>2</sup> )                 | National Land Cover Dataset (30 m)                                                                   |
|                  |          | Vegetation type                 | GlobCover 2005-06 (300 m)                     | National Land Cover Dataset (30 m)                                                                   |
|                  |          | Vegetation height               | No data (Bayesian priors)                     | Landfire (30 m)                                                                                      |
|                  |          | Mean days of precipitation/year | No data (Bayesian priors)                     | PRISM (vector data)                                                                                  |
|                  |          | Forest successional stage       | No data (Bayesian priors)                     | Interagency Vegetation Mapping Program (30 x 30 m)                                                   |
|                  |          | Developed land                  | GlobCover 2005-06 (300 m)                     | National Land Cover Dataset (30 m)                                                                   |
|                  |          | Floodplain extents              | Used local data for calculating flood extents | FEMA (vector data)                                                                                   |
|                  |          | DEM                             | SRTM (90 m)                                   | National Elevation Dataset (30 m)                                                                    |
|                  |          | Hydrography                     | Used local data for calculating water routing | Washington DNR (vector data)                                                                         |
|                  | Davos    | Land use type                   | CORINE Land Cover (250 m)                     | Local land use-land cover dataset (25 m)                                                             |
|                  |          | Soil data                       | National soil dataset                         | Local soil dataset MAB (25 m) for main valleys, joined with national soil dataset for remaining area |
|                  |          | Precipitation                   | Interpolation map of                          | Interpolation map of                                                                                 |

|               |          |                                                  |                                                                                                                                                             |                                                                                                                                                             |
|---------------|----------|--------------------------------------------------|-------------------------------------------------------------------------------------------------------------------------------------------------------------|-------------------------------------------------------------------------------------------------------------------------------------------------------------|
|               |          | (map)                                            | rain gauge measurements (250 m)                                                                                                                             | rain gauge measurements (25 m)                                                                                                                              |
|               |          | Precipitation (observation record)               | Precipitation measurement at rain gauge from national meteorological service                                                                                | Precipitation measurement at rain gauge from national meteorological service                                                                                |
|               |          | DEM                                              | SRTM (250 m)                                                                                                                                                | Swisstopo [87] (25 m)                                                                                                                                       |
| Stubai        |          | DEM                                              | SRTM (250 m)                                                                                                                                                | Local datasets Tyrolean Information System (tiris, Land Tirol©) (25 m)                                                                                      |
|               |          | Aboveground phytomass [57] related to land cover | CORINE Land Cover (250 m)                                                                                                                                   | Local LULC dataset (25 m)                                                                                                                                   |
|               |          | Soil                                             | Skeleton fraction-soil stone content in 0–0.1 m soil depth [79].                                                                                            | Skeleton fraction-soil stone content in 0–0.1 m soil depth [79].                                                                                            |
|               |          | Precipitation                                    | Average value from national meteorological service; own measurements                                                                                        | Average value from national meteorological service; own measurements                                                                                        |
| Trentino      |          | Curve Number                                     | Hydrological parameter assessing the capacity of the land (as a function of the cover types and of the permeability of the subsoil) to retain rain-off [81] | Hydrological parameter assessing the capacity of the land (as a function of the cover types and of the permeability of the subsoil) to retain rain-off [81] |
|               |          |                                                  | Vector map; 1:10000                                                                                                                                         | Vector map; 1:10000                                                                                                                                         |
| Scenic beauty | Puyallup | Elevation                                        | SRTM (90 m)                                                                                                                                                 | National Elevation Dataset (30 m)                                                                                                                           |
|               |          | Lakes and oceans                                 | GlobCover 2005-06 (300 m)                                                                                                                                   | National Land Cover Dataset (30 m)                                                                                                                          |

|  |                   |                            |                                                                                                |                                                                                                |
|--|-------------------|----------------------------|------------------------------------------------------------------------------------------------|------------------------------------------------------------------------------------------------|
|  |                   | Developed land             | GlobCover 2005-06 (300 m)                                                                      | National Land Cover Dataset (30 m)                                                             |
|  |                   | Clearcuts                  | No data (Bayesian priors)                                                                      | Washington DNR (vector data)                                                                   |
|  |                   | Highways                   | Digital Chart of the World (vector data)                                                       | TIGER (vector data)                                                                            |
|  |                   | Residential land use       | GlobCover 2005-06 (300 m)                                                                      | National Land Cover Dataset (30 m)                                                             |
|  | Davos<br>Stubai   | Viewpoints                 | 120 points randomly distributed along roads and hiking paths outside of forest and settlements | 120 points randomly distributed along roads and hiking paths outside of forest and settlements |
|  |                   | Land use                   | CORINE Land Cover (250 m)                                                                      | Local LULC dataset (25 m)                                                                      |
|  |                   | Terrain                    | SRTM (250 m)                                                                                   | Swisstopo / Tyrolean Information System (tiris, Land Tirol©) (25 m)                            |
|  |                   | Background                 | SRTM (1 km)                                                                                    | SRTM (1 km)                                                                                    |
|  |                   | Questionnaire              | Details in [76]                                                                                | Details in [76]                                                                                |
|  | Trentino          | Points of landscape beauty | 333 points surveyed by [77]                                                                    | 333 points surveyed by [69]                                                                    |
|  |                   | Terrain                    | SRTM (250 m)                                                                                   | Local DTM (25 m)                                                                               |
|  | Puyallup          | Timber parcels             | GlobCover 2005-06 (300 m)                                                                      | Washington DNR                                                                                 |
|  | Timber production | Forest parcels             | CORINE Land Cover (250 m)                                                                      | Local LULC dataset (25 m)                                                                      |
|  |                   | Davos                      | Elevation                                                                                      | Swisstopo (25 m)                                                                               |
|  |                   |                            | Harvestable amount of timber                                                                   | Observed yearly amount between 1995 and 2005 [60]                                              |
|  |                   | Stubai                     | Forest parcels                                                                                 | Local datasets Tyrolean Information                                                            |

|                        |                 |                                        |                                                    |                                                                                         |
|------------------------|-----------------|----------------------------------------|----------------------------------------------------|-----------------------------------------------------------------------------------------|
| Agriculture production |                 | Harvesting method                      | (250 m)<br>CORINE Land Cover (250 m)               | System (tiris, Land Tirol©) (25 m)<br>Local dataset including harvesting methods (25 m) |
|                        |                 |                                        |                                                    |                                                                                         |
|                        | Trentino        | Forest parcels                         | CORINE Land Cover (250 m)                          | Local forest inventory (25 m)                                                           |
|                        | Puyallup        | Agricultural land use                  | GlobCover 2005-06 (300 m)                          | National Land Cover Dataset (30 m)                                                      |
|                        |                 | Market value of agricultural products  | 2007 USDA Census of Agriculture [58]               | 2007 USDA Census of Agriculture [58]                                                    |
|                        | Davos<br>Stubai | DEM                                    | SRTM (250 m)                                       | Swisstopo / Tyrolean Information System (tiris, Land Tirol©) (25 m)                     |
|                        |                 | Agricultural land use                  | CORINE Land Cover (250 m)                          | Local LULC dataset (25 m)                                                               |
|                        |                 | Summer precipitation                   | Average value from national meteorological service | Average value from national meteorological service                                      |
|                        |                 | Fodder price                           | Market prices reported in yearly surveys           | Market prices reported in yearly surveys                                                |
|                        |                 | Agricultural land use                  | CORINE Land Cover (250 m)                          | Local LULC dataset (25 m)                                                               |
|                        | Trentino        | Agricultural products and fodder price | Market prices reported in yearly surveys [56]      | Market prices reported in yearly surveys [56]                                           |
